# Supplementary material for: Circulating Fibroblast Growth Factor‐23 and the Incidence of Atrial Fibrillation: The Atherosclerosis Risk in Communities Study
Source: PubMed Central journal article supplement — J Am Heart Assoc. 2014 Sep 18;3(5):e001082. doi: 10.1161/JAHA.114.001082 (PMC4323781; doi:10.1161/jaha.114.001082), 2014-09-18
Supplement: jah3-3-e001082-s1.pdf [file jah3-3-e001082-s1.pdf]

## SUPPLEMENTAL MATERIAL

Supplemental Table 1. Baseline characteristics of participants in the ARIC, MESA and CHS cohorts. Information from MESA and CHS is derived from data presented in the paper by Mathew et al.<sup>1</sup>

|                                 | <b>ARIC</b> | <b>MESA</b> | <b>CHS</b> |
|---------------------------------|-------------|-------------|------------|
| N                               | 12349       | 6398        | 1350       |
| Age, years                      | 56.9        | 64.5        | 77.0       |
| Women, %                        | 56.9        | 53.3        | 71.3       |
| Non-white, %                    | 23.5        | 61.2        | 12.8       |
| Current smoker, %               | 21.7        | 12.8        | 7.1        |
| BMI, kg/m <sup>2</sup>          | 27.9        | 28.3        | 26.9       |
| Diabetes, %                     | 14.3        | 12.2        | 10.6       |
| SBP, mmHg                       | 121         | 126         | 137        |
| eGFR, mL/min/1.73m <sup>2</sup> | 95          | 85          | 66         |
| Prevalent CHD, %                | 5.5         | 0           | 0          |
| Prevalent HF, %                 | 4.4         | 0           | 0          |

Values correspond to means or %. ARIC: Atherosclerosis Risk in Communities; BMI: Body mass index; CHD: Coronary heart disease; CHS: Cardiovascular Health Study; HF: Heart failure; SBP: Systolic blood pressure

## REFERENCES

1. Mathew JS, Sachs MC, Patton KK, Heckbert SR, Hoofnagle AN, Alonso A, Chonchol M, Deo R, Ix JH, Siscovick DS, Kestenbaum BR, De Boer IH. Fibroblast growth factor-23 and incident atrial fibrillation: the Multi-Ethnic Study of Atherosclerosis (MESA) and the Cardiovascular Health Study (CHS). *Circulation*. 2014;130:298-307.
